# Supplementary material for: Microwave synthesis of ZnIn2S4/WS2 composites for photocatalytic hydrogen production and hexavalent chromium reduction
Source: Royal Society of Chemistry journal article supplement (doi:10.1039/c9cy01553a), 2019-01-01
Supplement: c9cy01553a1.pdf [file c9cy01553a1.pdf]

## Supplementary Information

### Microwave synthesis of ZnIn<sub>2</sub>S<sub>4</sub>/WS<sub>2</sub> composites for photocatalytic hydrogen production and hexavalent chromium reduction

Watcharapong Pudkon<sup>a,b</sup>, Sulawan Kaowphong<sup>a,c</sup>, Samuel Pattisson<sup>d</sup>, Peter J. Miedziak<sup>d,e</sup>, Hasliza Bahruji<sup>d</sup>, Thomas E. Davies<sup>d</sup>, David J. Morgan<sup>d</sup> and Graham J. Hutchings<sup>d,\*</sup>

<sup>a</sup>Department of Chemistry, Faculty of Science, Chiang Mai University, Chiang Mai 50200, Thailand

<sup>b</sup>Graduate School, Chiang Mai University, Chiang Mai 50200, Thailand

<sup>c</sup>Center of Excellence in Materials Science and Technology, Chiang Mai University, Chiang Mai 50200, Thailand

<sup>d</sup>Cardiff Catalysis Institute, School of Chemistry, Cardiff University, Main Building, Park Place CF10 3AT, Cardiff, UK

<sup>e</sup>School of Applied Sciences, University of South Wales, Pontypridd CF37 4AT, UK

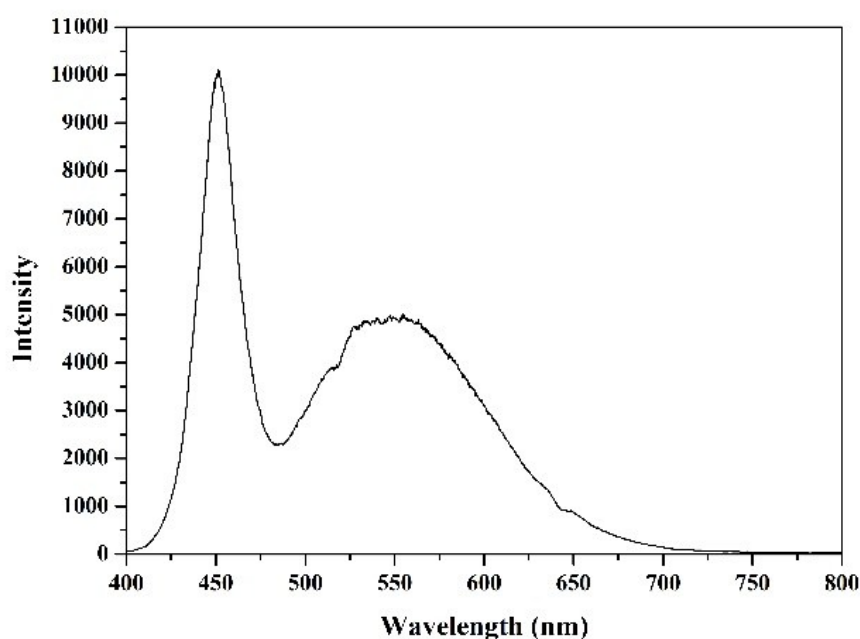

**Fig. S1.** Spectral irradiance of the 50 W LED lamp.

**Table S1.** The apparent quantum yield (AQY) of the ZnIn<sub>2</sub>S<sub>4</sub>/WS<sub>2</sub> photocatalyst for the photocatalytic H<sub>2</sub> production compared with the previous literatures.

| Photocatalyst                                                     | Weight of photocatalyst (mg) | Light source details                | AQY (%) | Ref. |
|-------------------------------------------------------------------|------------------------------|-------------------------------------|---------|------|
| ZnIn <sub>2</sub> S <sub>4</sub> /WS <sub>2</sub><br>(Our work)   | 100                          | 150 W Xe lamp ( $\lambda > 400$ nm) | 0.27    | -    |
| ZnIn <sub>2</sub> S <sub>4</sub> /g-C <sub>3</sub> N <sub>4</sub> | 500                          | 300 W Xe lamp ( $\lambda > 400$ nm) | 0.28    | [1]  |
| ZnIn <sub>2</sub> S <sub>4</sub> /RGO/MoS <sub>2</sub>            | 100                          | 300 W Xe lamp ( $\lambda > 420$ nm) | 0.4     | [2]  |
| ZnIn <sub>2</sub> S <sub>4</sub> /RGO/BiVO <sub>4</sub>           | 200                          | 350 W Xe lamp ( $\lambda > 420$ nm) | 0.8     | [3]  |

**Table S2.** The apparent quantum yield (AQY) of the ZnIn<sub>2</sub>S<sub>4</sub>/WS<sub>2</sub> photocatalyst for the photocatalytic Cr(VI) reduction compared with the previous literatures.

| Photocatalyst                                                   | Weight of photocatalyst (mg) | Light source details                      | AQY (%) | Ref. |
|-----------------------------------------------------------------|------------------------------|-------------------------------------------|---------|------|
| ZnIn <sub>2</sub> S <sub>4</sub> /WS <sub>2</sub><br>(Our work) | 100                          | 150 W Xe lamp ( $\lambda > 400$ nm)       | 0.21    | -    |
| CuAl <sub>2</sub> O <sub>4</sub> /TiO <sub>2</sub>              | 100                          | 200 W Xe lamp (under polychromatic light) | 0.11    | [4]  |
| CoO                                                             | 20                           | 300 W Xe lamp ( $\lambda > 440$ nm)       | 0.17    | [5]  |

## References

- [1] Z. Zhang, K. Liu, Z. Feng, Y. Bao and B. Dong, *Scientific Reports*, 2016, **6**, 19221(1)-19221(10).
- [2] N. Ding, Y. Fan, Y. Luo, D. Li and Q. Meng, *APL Materials*, 2015, **3**, 104417(1)-104417(7).
- [3] R. Zhu, F. Tian, G. Cao and F. Ouyang, *International Journal of Hydrogen Energy*, 2017, **42**, 17350-17361.
- [4] R. Gherbi, N. Nasrallah, A. Amrane, R. Maachi and M. Trari, *J. Hazard. Mater.*, 2011, **186**, 1124-1130.
- [5] G. Velegraki, J. Miao, C. Drivas, B. Liu, S. Kennou and G. S. Armatas, *Appl. Catal. B: Environ.*, 2018, **221**, 635-644.
